# Supplementary material
Source: PubMed Central journal article supplement (PMC3079324)
Supplement: NIHMS261581-supplement-1_si_001.pdf [file NIHMS261581-supplement-1_si_001.pdf]

## Supporting Information

# Asymmetric Synthesis of 1,2,9,9a-Tetrahydrocyclopropa[*c*]benzo[*e*]indol-4-one (CBI)

James P. Lajiness and Dale L. Boger

*Contribution from the Department of Chemistry and The Skaggs Institute for Chemical Biology, The Scripps  
Research Institute, 10550 North Torrey Pines Road, La Jolla, California 92037*

*boger@scripps.edu*

### Table of Contents

|                                                         |     |
|---------------------------------------------------------|-----|
| General Experimental.....                               | S2  |
| Figure 3, HPLC trace of <b>8</b> .....                  | S2  |
| <sup>1</sup> H NMR spectrum of compound <b>5</b> .....  | S3  |
| <sup>13</sup> C NMR spectrum of compound <b>5</b> ..... | S4  |
| <sup>1</sup> H NMR spectrum of compound <b>6</b> .....  | S5  |
| <sup>13</sup> C NMR spectrum of compound <b>6</b> ..... | S6  |
| <sup>1</sup> H NMR spectrum of compound <b>7</b> .....  | S7  |
| <sup>13</sup> C NMR spectrum of compound <b>7</b> ..... | S8  |
| <sup>1</sup> H NMR spectrum of compound <b>8</b> .....  | S9  |
| <sup>1</sup> H NMR spectrum of compound <b>9</b> .....  | S10 |
| <sup>1</sup> H NMR spectrum of compound <b>10</b> ..... | S11 |

**General:** THF was freshly distilled from sodium benzophenone ketyl. All reactions were performed in oven-dried glassware under an Argon atmosphere. Evaporation and concentration in vacuo was performed at 20 °C and ca. 760 mm Hg. Further drying of the new compounds was carried out at ca. 5 millibar. NMR ( $^1\text{H}$  or  $^{13}\text{C}$ ): residual solvent peaks were used as an internal reference. Coupling constants ( $J$ ) (H,H) are given in Hz. Coupling patterns are designated as singlet (s), doublet (d), triplet (t), quadruplet (q), multiplet (m), or broad signal (br). High resolution mass spectral data were acquired on a LC/MSD-TOF and the detected masses are given as  $m/z$  with  $M$  representing the molecular ion.

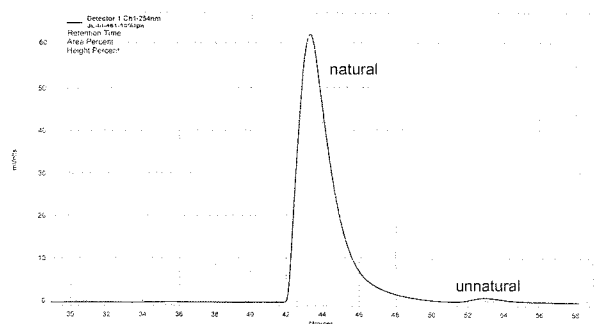

**Figure 3.** HPLC trace of **8** (99% ee; Chiralcel OD; 10% *i*-PrOH/hexanes; 7 mL/min).



Compound 5  
Acetone-d6  
150 MHz

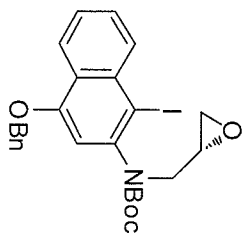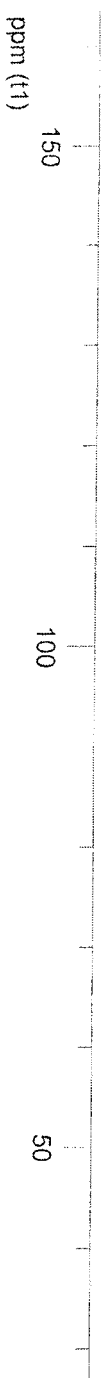

Spectrum Title:  
C-13 Routine 1D, DCH (

Frequency (MHz):  
(f1) 150.918  
Original Points Count:  
(f1) 32768  
Actual Points Count:  
(f1) 65536  
Acquisition Time (sec):  
(f1) 0.8716  
Spectral Width (ppm):  
(f1) 249.102  
Pulse Program:  
ZPG45  
Temperature:  
288.3  
Number of Scans:  
57



Compound 6  
Acetone-d6  
150 MHz

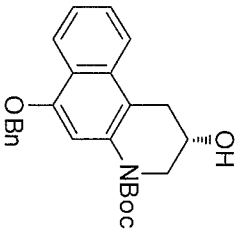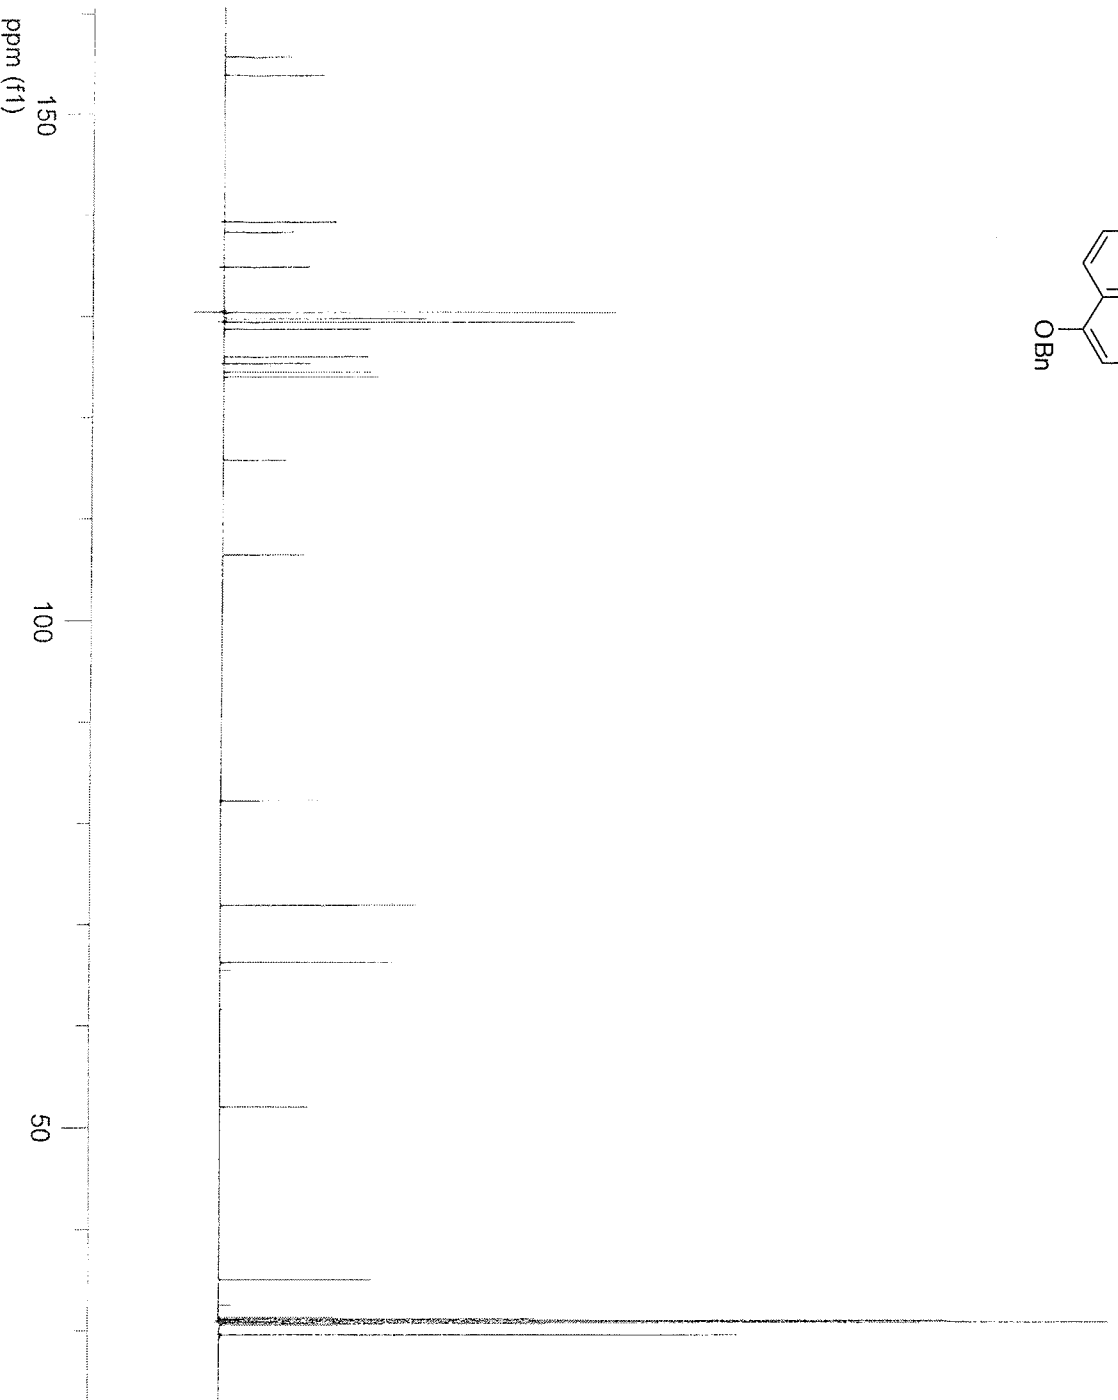

**Spectrum Title:**  
C-13 Routine 1D, DCH

**Frequency (MHz):**  
(f1) 150.918  
**Original Points Count:**  
(f1) 65536  
**Actual Points Count:**  
(f1) 65536  
**Acquisition Time (sec)**  
(f1) 1.7433  
**Spectral Width (ppm):**  
(f1) 249.102  
**Pulse Program:**  
ZGPG45  
**Temperature:**  
298  
**Number of Scans:**  
405

96

Compound 7  
Acetone-d6  
400 MHz

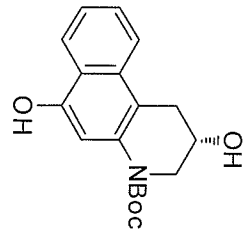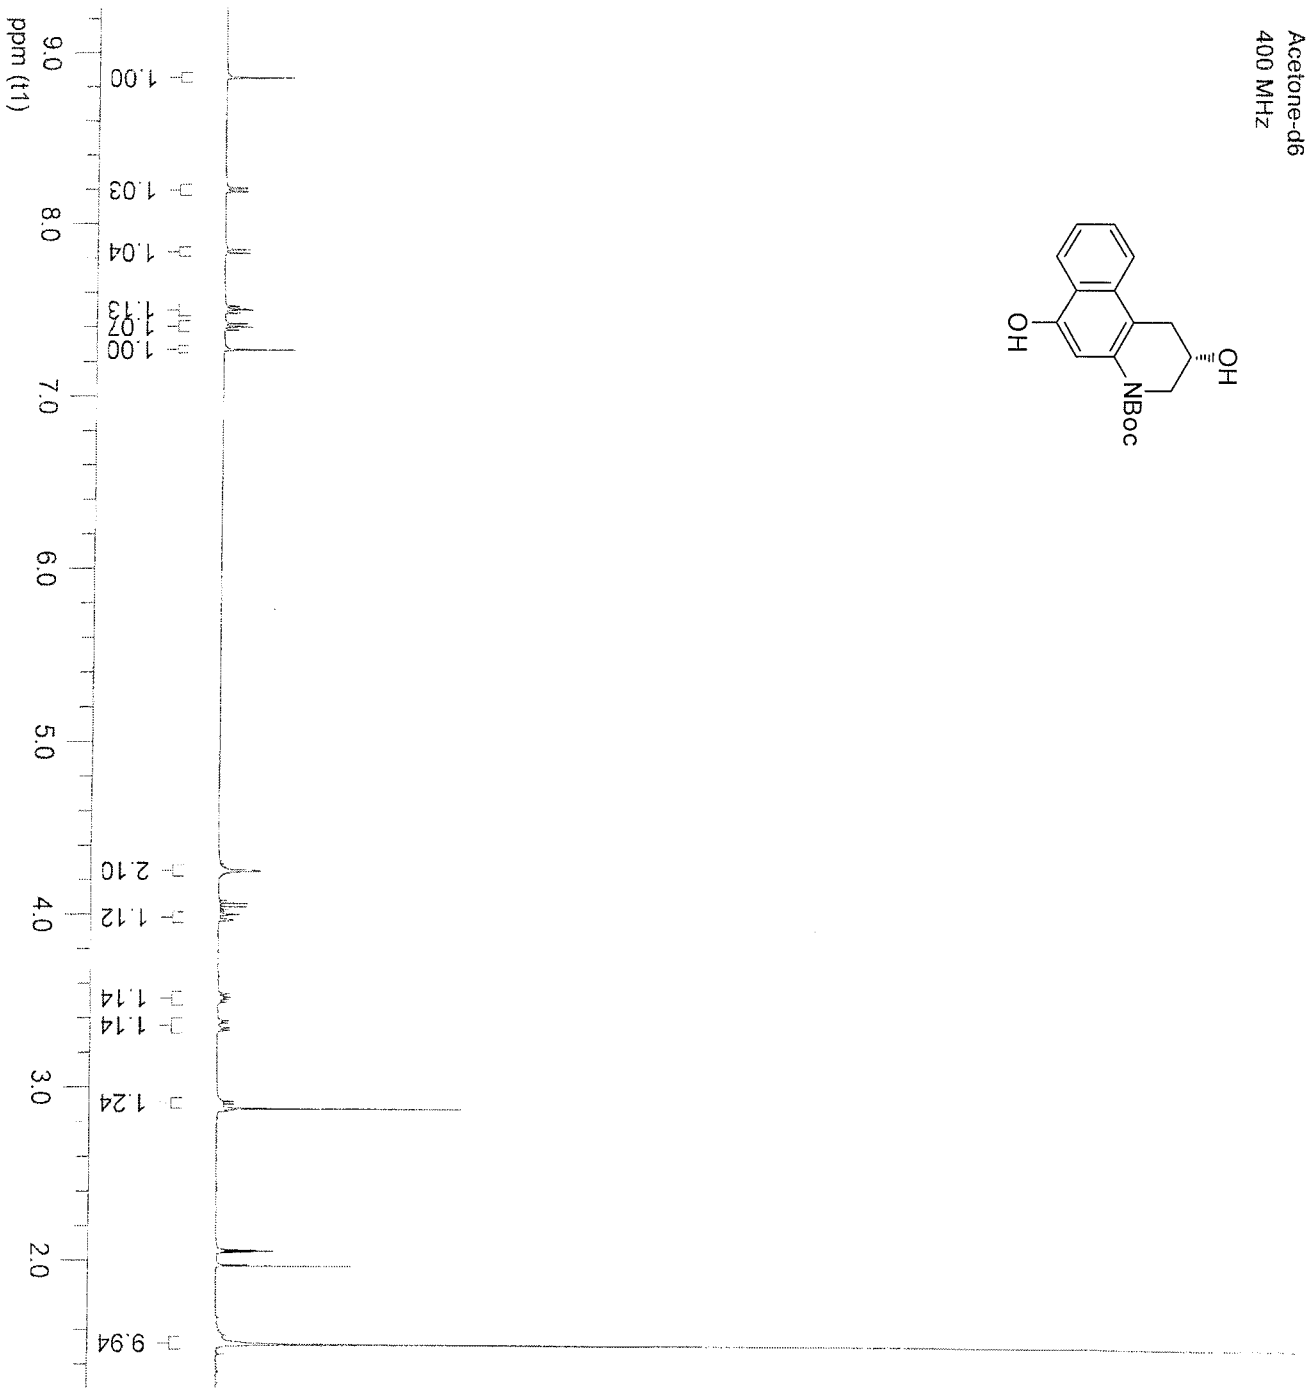

**Spectrum Title:**  
H-1 Routine 1D experim

**Frequency (MHz):**  
(f1) 400.122

**Original Points Count:**  
(f1) 16384

**Actual Points Count:**  
(f1) 32768

**Acquisition Time (sec):**  
(f1) 3.4166

**Spectral Width (ppm):**  
(f1) 11.985

**Pulse Program:**  
ZG30

**Temperature:**  
298.5

**Number of Scans:**  
10

Compound 7  
Acetone-d6  
150 MHz

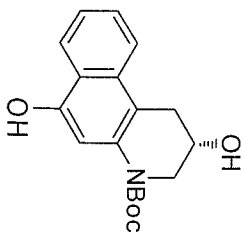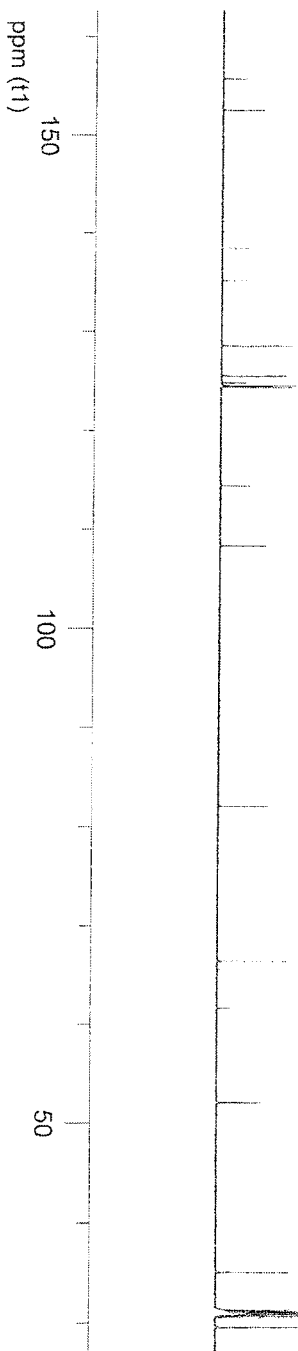

**Spectrum Title:**  
C-13 Routine 1D, DCH Cryol

**Frequency (MHz):**  
(f1) 150.918  
**Original Points Count:**  
(f1) 32768  
**Actual Points Count:**  
(f1) 65536  
**Acquisition Time (sec):**  
(f1) 0.8716  
**Spectral Width (ppm):**  
(f1) 249.102  
**Pulse Program:**  
ZPGPG45  
**Temperature:**  
298  
**Number of Scans:**  
81



Compound 8  
Acetone-d6  
400 MHz

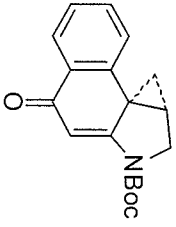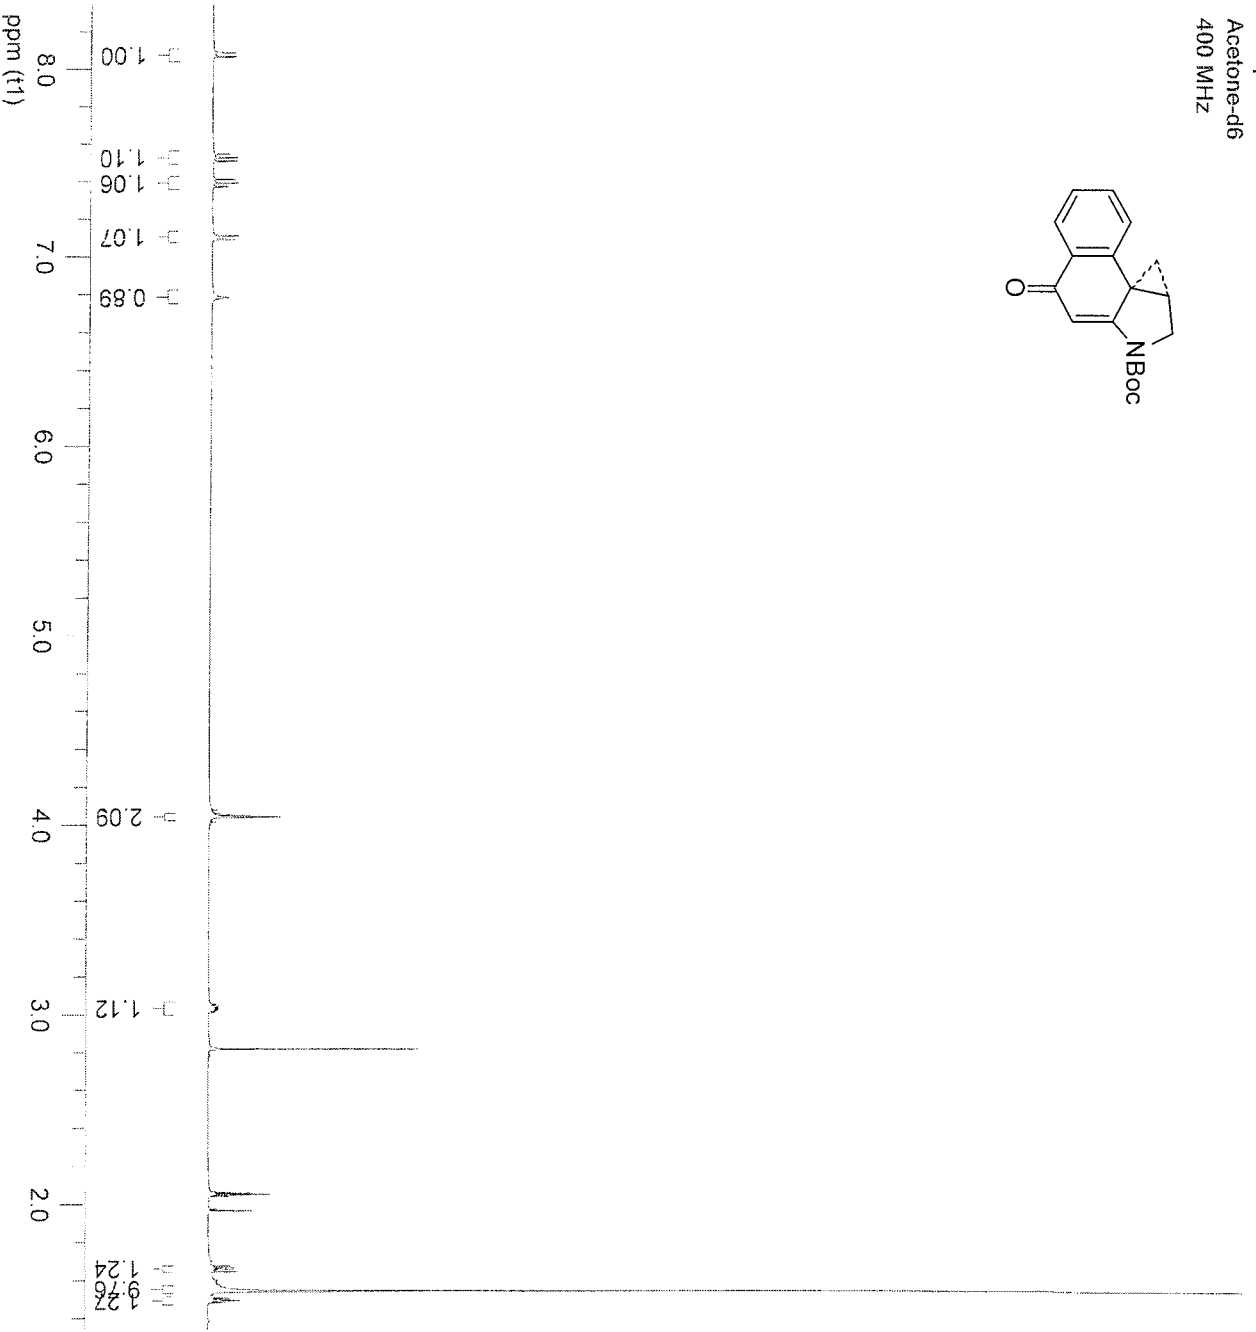

**Spectrum Title:**  
H-1 Routine 1D experiment.

**Frequency (MHz):**

(f1) 400.122

**Original Points Count:**

(f1) 16384

**Actual Points Count:**

(f1) 32768

**Acquisition Time (sec):**

(f1) 3.4166

**Spectral Width (ppm):**

(f1) 11.985

**Pulse Program:**

ZG30

**Temperature:**

298.6

**Number of Scans:**

15

Compound 9  
Acetone-d6  
400 MHz

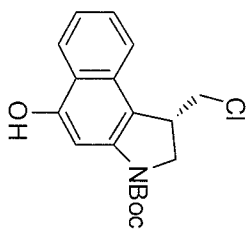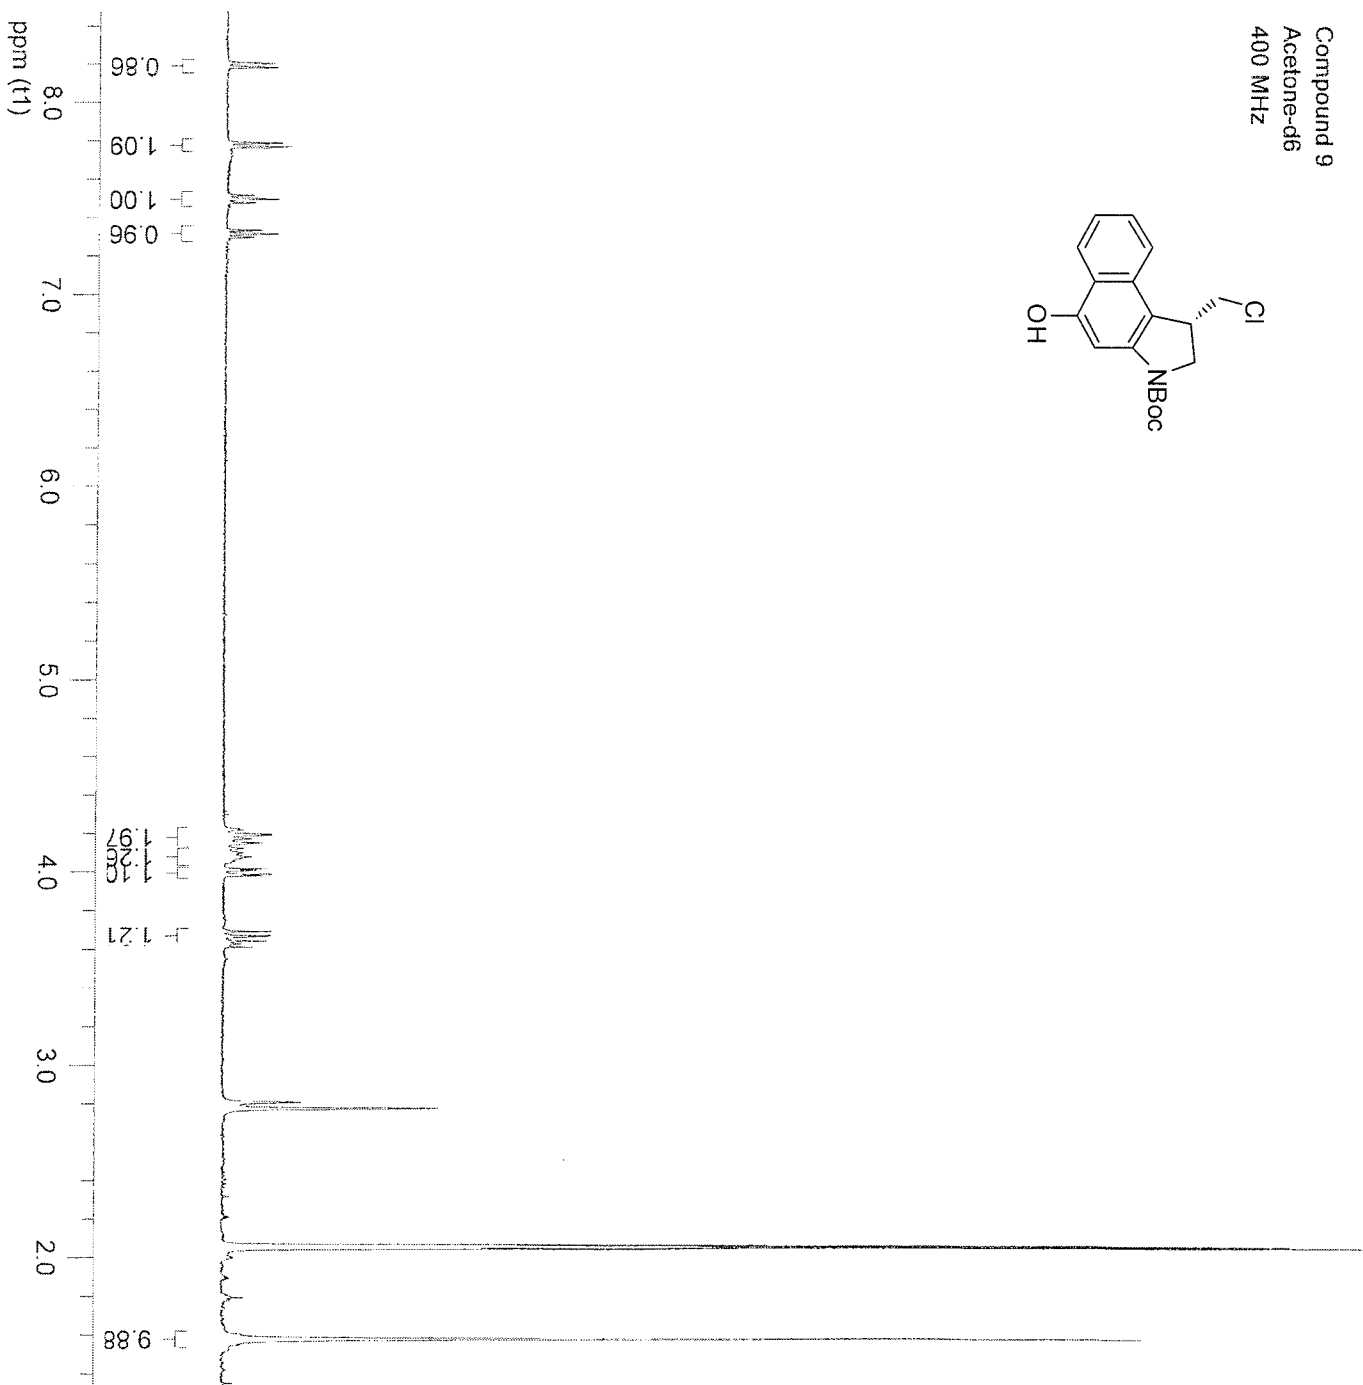

Document's Title:  
JL-1-339\_01.fid  
Spectrum Title:  
Std proton  
Frequency (MHz):  
(f1) 399.738  
Original Points Count:  
(f1) 13103  
Actual Points Count:  
(f1) 32768  
Acquisition Time (sec):  
(f1) 2.0487  
Spectral Width (ppm):  
(f1) 16.000  
Pulse Program:  
s2pul  
Temperature:  
25  
Number of Scans:  
32
